# Supplementary material for: Impact of atmospheric water-soluble iron on α-pinene-derived SOA formation and transformation in the presence of aqueous droplets
Source: Royal Society of Chemistry journal article supplement (doi:10.1039/d4ea00095a), 2024-01-01
Supplement: d4ea00095a1.pdf [file d4ea00095a1.pdf]

## Supplementary Information

### **Impact of atmospheric water-soluble iron on $\alpha$ -pinene-derived SOA formation and transformation in the presence of aqueous droplets**

Sabine Lühtrath<sup>1</sup>, Sven Klemer<sup>1</sup>, Clément Dubois<sup>2\*</sup>, Christian George<sup>2</sup>, Andreas Held<sup>1</sup>

<sup>1</sup>Department of Environmental Chemistry and Air Research, Technische Universität Berlin, 10623 Berlin, Germany

<sup>2</sup>Univ Lyon, Université Claude Bernard Lyon 1, CNRS, IRCELYON, F- 69626, Villeurbanne, France

\*Current laboratory: Department of Chemistry, Aarhus University, 8000 Aarhus, Denmark

### SI-1: Procedure of Solid-Phase-Extraction

Half of the filter was extracted in 2 mL of 1.25%-NH<sub>3</sub> and shaken for 1 h using a horizontal shaker with 60 rotations per minute. 1.5 mL of the extract were transferred to a brown glass snap lid jar. The extraction procedure was repeated two times resulting in an extraction volume of 3 mL which was subsequently acidified with 60 µL of formic acid (≥99%, VWR, Radnor, USA). The C<sub>18</sub> SPE cartridges were conditioned with 1 mL of methanol and 1 mL of 1.25% formic acid. The extract was filtered through a PTFE filter (Minisart SRP4, Sartorius AG, Göttingen, Germany) and added to the SPE cartridges. After washing with 4 mL of 2% formic acid (20 µL formic acid ≥99,0%, Carl Roth, Karlsruhe, Germany in 1 mL HPLC-MS grade H<sub>2</sub>O, Carl Roth, Karlsruhe, Germany) the sample was eluted in 800 µL of HPLC-MS grade methanol (HiPerSolv Chromanorm, VWR, Radnor, USA).

According to the protocol the samples were stored in MeOH after the SPE. While Bateman et al. (2008) discovered slow formation of esters by reaction of carboxylic acids, Kourtchev et al. did not observe any differences which could be linked to methylesters of carboxylic acids between boreal forests samples stored in MeOH or acetonitrile.

### References

- Bateman, A. P.; Walser, M. L.; Desyaterik, Y.; Laskin, J.; Laskin, A.; Nizkorodov, S. A. The Effect of Solvent on the Analysis of Secondary Organic Aerosol Using Electrospray Ionization Mass Spectrometry. *Environ. Sci. Technol.* **2008**, *42* (19), 7341–7346. <https://doi.org/10.1021/es801226w>.
- Kourtchev, I.; Doussin, J.-F.; Giorio, C.; Mahon, B.; Wilson, E. M.; Maurin, N.; Pangui, E.; Venables, D. S.; Wenger, J. C.; Kalberer, M. Molecular Composition of Fresh and Aged Secondary Organic Aerosol from a Mixture of Biogenic Volatile Compounds: A High-Resolution Mass Spectrometry Study. *Atmos. Chem. Phys.* **2015**, *15* (10), 5683–5695. <https://doi.org/10.5194/acp-15-5683-2015>.



**Table S1: Overview of calculated parameters of experiment 3 describing FS-seed and new formed**

| experiment | Parameters of 0.1 mM FS-solution |                                          |            | Parameters of particles from nebulized FS-solution   |                          |                                           |                                          | Parameters of new formed particles |                                         |                                         | Ratio of new formed particles and FS seeds |                                                             |
|------------|----------------------------------|------------------------------------------|------------|------------------------------------------------------|--------------------------|-------------------------------------------|------------------------------------------|------------------------------------|-----------------------------------------|-----------------------------------------|--------------------------------------------|-------------------------------------------------------------|
|            | pH                               | c <sub>H2O2</sub> [mmol <sup>L-1</sup> ] | category   | A <sub>salt</sub> [mm <sup>2</sup> /m <sup>3</sup> ] | GMD <sub>salt</sub> [nm] | TNC <sub>salt</sub> [# /cm <sup>3</sup> ] | TMC <sub>salt</sub> [μg/m <sup>3</sup> ] | GMD <sub>mix-salt</sub> [nm]       | TNC <sub>new</sub> [# /m <sup>3</sup> ] | TMC <sub>new</sub> [μg/m <sup>3</sup> ] | Δ GMD <sub>mix-salt</sub> [nm]             | TMC <sub>new</sub> /A <sub>salt</sub> [μg/mm <sup>2</sup> ] |
| 3A-2       | ≈ 5                              | 0                                        | <b>I</b>   | 389                                                  | 34.4                     | 46386                                     | 6.0                                      | 41,57                              | 80554                                   | 12,39                                   | 7,14                                       | 0,03                                                        |
| 3B-2       | ≈ 5                              | 0                                        | <b>I</b>   | 584                                                  | 31.9                     | 86373                                     | 7.9                                      | 35,75                              | 25879                                   | 7,03                                    | 3,82                                       | 0,012                                                       |
| 3A-1       | ≈ 5                              | 1                                        | <b>II</b>  | 998                                                  | 34.9                     | 125740                                    | 14.3                                     | 39,78                              | 19361                                   | 10,19                                   | 6,32                                       | 0,01                                                        |
| 3B-1       | ≈ 5                              | 1                                        | <b>II</b>  | 572                                                  | 30.2                     | 94602                                     | 7.3                                      | 36,35                              | 23264                                   | 5,37                                    | 6,15                                       | 0,008                                                       |
| 3B-2       | ≈ 5                              | 1                                        | <b>II</b>  | 982                                                  | 32.8                     | 137491                                    | 13.5                                     | 35,4                               | 23048                                   | 2,1                                     | 2,55                                       | 0,002                                                       |
| 3A-1       | < 3                              | 1                                        | <b>III</b> | 882*                                                 | *                        | *                                         | 10.6                                     | 37,37                              | 52009                                   | 31,02                                   | 9,21                                       | 0,035                                                       |
| 3A-2       | < 3                              | 0                                        | <b>III</b> | 535                                                  | 28.9                     | 91235                                     | 7.0                                      | 39,62                              | 76546                                   | 40,44                                   | 12,62                                      | 0,075                                                       |
| 3B-2       | < 3                              | 0                                        | <b>III</b> | 1844                                                 | 30.7                     | 214138                                    | 33.7                                     | 31,72                              | 50755                                   | 3,02                                    | 1,77                                       | 0,0016                                                      |
| 3A-1       | < 3                              | 1                                        | <b>IV</b>  | 882                                                  | 28.2                     | 165839                                    | 10.6                                     | 34,38                              | 58709                                   | 25,64                                   | 6,22                                       | 0,03                                                        |
| 3A-2       | < 3                              | 1                                        | <b>IV</b>  | 460                                                  | 29.0                     | 82344                                     | 5.7                                      | 39,29                              | 90322                                   | 40,92                                   | 10,28                                      | 0,08                                                        |
| 3B-1       | < 3                              | 1                                        | <b>IV</b>  | 806                                                  | 28.7                     | 147189                                    | 9.8                                      | 38,98                              | 122432                                  | 56,43                                   | 10,2                                       | 0,07                                                        |
| 3B-2       | < 3                              | 1                                        | <b>IV</b>  | 1720                                                 | 29.9                     | 237284                                    | 27.2                                     | 33,33                              | 62620                                   | 23,69                                   | 3,38                                       | 0,01                                                        |

**SOA particles**

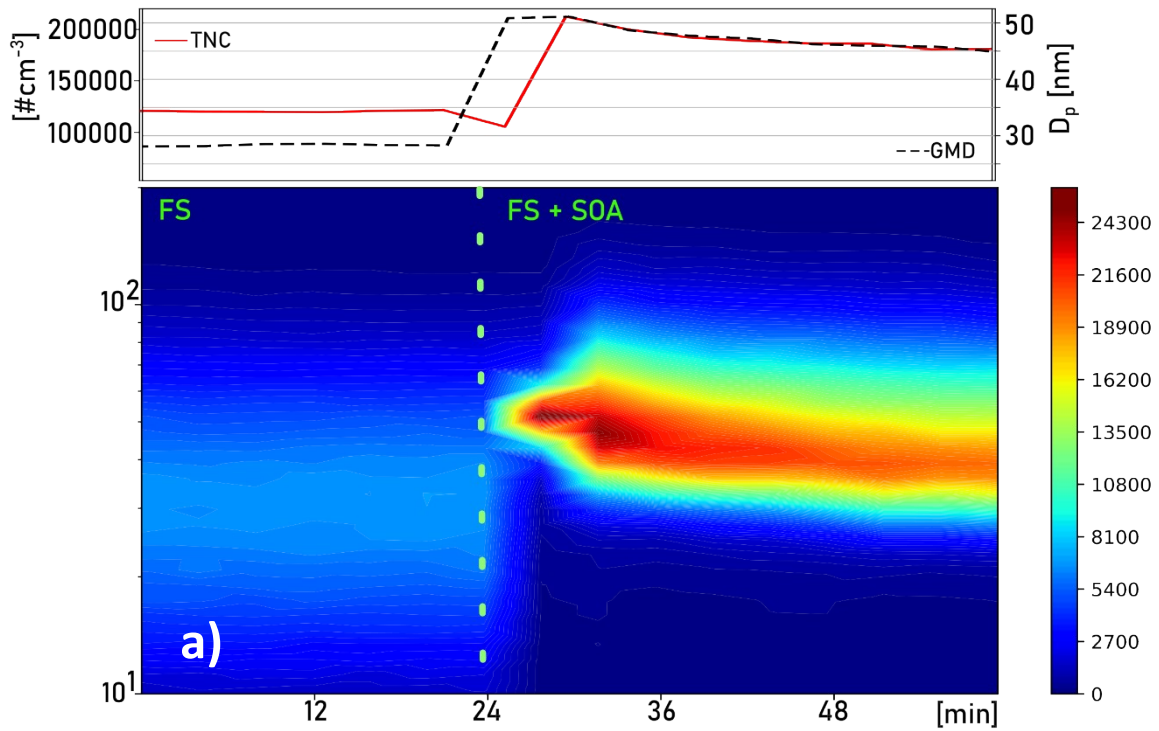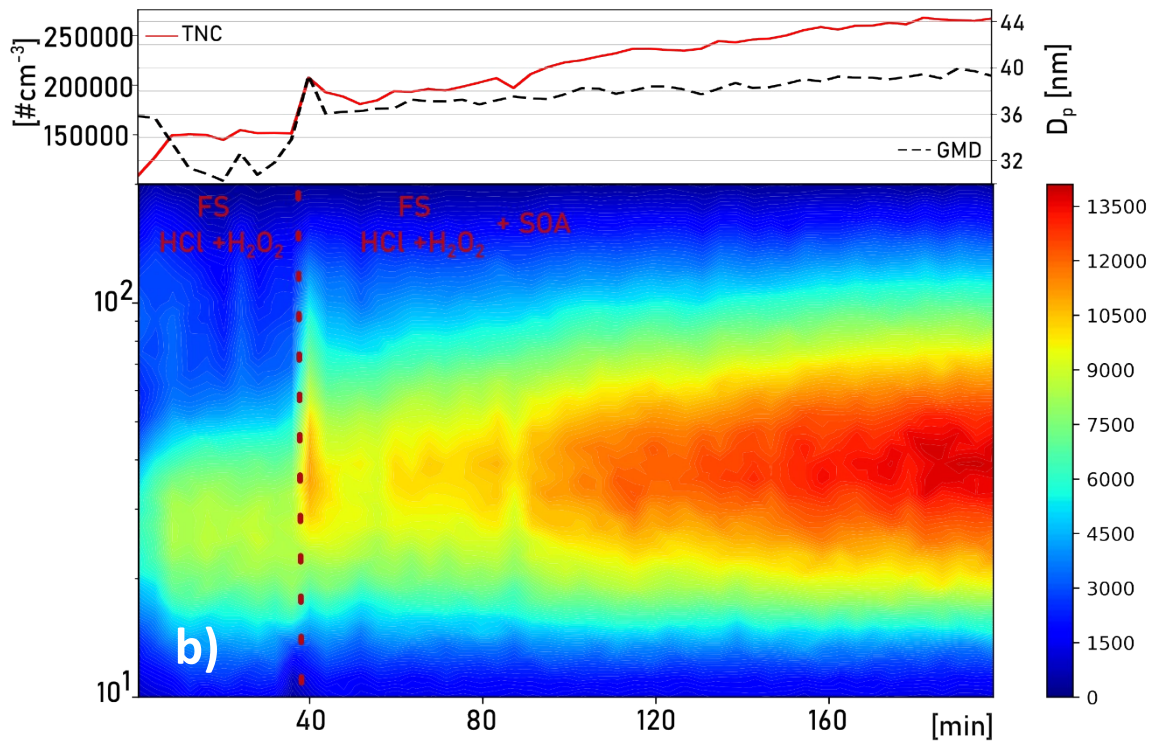

**Figure S2:** Evolution of particle size distribution over time when initiating SOA formation. Starting times when  $\alpha$ -pinene and gaseous ozone were added to the system are marked with the dashed line. **a)** shows quick adjustment of GMD and TNC when only a FS solution is nebulized. **b)** shows that it needed more than 120 min (in this experiment) until stable conditions were reached when nebulizing an acidified solution of category IV.

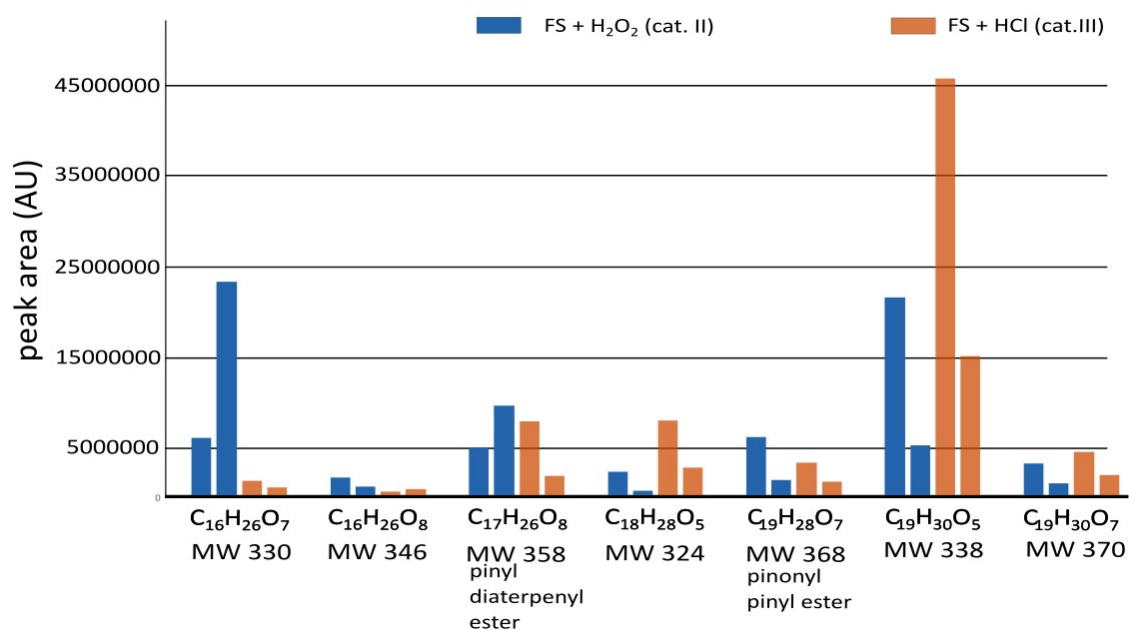

**Figure S3:** Influence of acidity on dimer abundance in FS samples with pH >3 (blue) or pH <3 (red). The samples are corrected by their differences in organic filter loading. A correction factor was calculated by integrating the total ion count over the range of retention time in which molecules linked to  $\alpha$ -pinene-ozonolysis were found.

**Table S2: List of m/z values of main oxidation products of targeted analysis**

| m/z neg. mode | m/z pos mode | Formular                                        | potential substance        | Ret. time | Error [Δppm] | RDB | Bidest ref | Fe + H <sub>2</sub> O <sub>2</sub> cat. II | Fe + HCl cat. III | Fe+HCl + H <sub>2</sub> O <sub>2</sub> cat. IV | reference               |
|---------------|--------------|-------------------------------------------------|----------------------------|-----------|--------------|-----|------------|--------------------------------------------|-------------------|------------------------------------------------|-------------------------|
|               | 169.122      | C <sub>10</sub> H <sub>16</sub> O <sub>2</sub>  | pinonaldehyde              | 8.16      | -0.562       | 2.5 | X          | X                                          | X                 | X                                              |                         |
| 171.066       |              | C <sub>8</sub> H <sub>12</sub> O <sub>4</sub>   | terpenylic acid            | 7.15      | 1.035        | 3.5 | X          | X                                          | X                 | X                                              |                         |
| 185.081       |              | C <sub>9</sub> H <sub>14</sub> O <sub>4</sub>   | pinic acid                 | 6.63      | -0.102       | 3.5 | X          | X                                          | X                 | X                                              |                         |
|               | 185.117      | C <sub>10</sub> H <sub>16</sub> O <sub>6</sub>  | cis-pinonic acid           | 7.53      | -0.56        | 3.5 | X          | X                                          | X                 | X                                              |                         |
| 187.097       |              | C <sub>9</sub> H <sub>16</sub> O <sub>4</sub>   | diaterpenylic acid acetate | 7.54      | 0.985        | 2.5 | X          | X                                          | X                 | X                                              |                         |
| 203.055       |              | C <sub>8</sub> H <sub>12</sub> O <sub>6</sub>   | MBTCA                      | -         | -            | -   | 0          | 0                                          | 0                 | 0                                              |                         |
| 217.108       |              | C <sub>10</sub> H <sub>18</sub> O <sub>5</sub>  |                            | 6.74      | -0.177       | 2.5 | 0          | X                                          | X                 | 0                                              | Poulain et al., 2022    |
| 323.186       |              | C <sub>18</sub> H <sub>28</sub> O <sub>5</sub>  |                            | 8.42      | -1.69        | 5.5 | 0          | X                                          | X                 | X                                              | Kenseth et al., 2018    |
| 329.16        |              | C <sub>16</sub> H <sub>26</sub> O <sub>7</sub>  |                            | 7.38      | -0.9         | 5.5 | X          | X                                          | X                 | X                                              |                         |
| 335.185       |              | C <sub>19</sub> H <sub>28</sub> O <sub>5</sub>  |                            | 6.75      | -0.58        | 5.5 | 0          | 0                                          | 0                 | X                                              | Kristensen et al., 2016 |
| 337.202       |              | C <sub>19</sub> H <sub>23</sub> O <sub>5</sub>  |                            | 8.74      | -0.47        | 5.5 | X          | X                                          | X                 | X                                              | Kristensen et al., 2016 |
| 341.196       |              | C <sub>18</sub> H <sub>23</sub> O <sub>6</sub>  |                            | 8.17      | -0.89        | 4.5 | 0          | 0                                          | X                 | X                                              | Kenseth et al., 2018    |
| 345.155       |              | C <sub>16</sub> H <sub>26</sub> O <sub>8</sub>  |                            | 8.3       | -1.7         | 4.5 | X          | X                                          | X                 | X                                              | Kenseth et al., 2018    |
| 353.196       |              | C <sub>19</sub> H <sub>23</sub> O <sub>6</sub>  |                            | 8.72      | -2.44        | 5.5 | 0          | X                                          | X                 | X                                              | Kristensen et al., 2016 |
| 357.155       |              | C <sub>17</sub> H <sub>26</sub> O <sub>8</sub>  | Pinyl diaterpenyl ester    | 7.8       | -0.28        | 5.5 | X          | X                                          | X                 | X                                              | Kristensen et al., 2014 |
| 367.175       |              | C <sub>19</sub> H <sub>28</sub> O <sub>7</sub>  | Pinonyl-pinyl ester        | 8.77      | -2.52        | 6.5 | X          | X                                          | X                 | X                                              | Kristensen et al., 2014 |
| 369.192       |              | C <sub>19</sub> H <sub>23</sub> O <sub>7</sub>  |                            | 7.55      | -0.78        | 5.5 | X          | 0                                          | X                 | X                                              | Kenseth et al., 2018    |
| 377.145       |              | C <sub>16</sub> H <sub>26</sub> O <sub>10</sub> |                            | 7.48      | -0.98        | 4.5 | X          | 0                                          | 0                 | 0                                              | Kristensen et al., 2016 |

**References:**

- Kenseth, C. M., Huang, Y., Zhao, R., Dalleska, N. F., Hethcox, J. C., Stoltz, B. M., & Seinfeld, J. H. (2018). Synergistic O<sub>3</sub> + OH oxidation pathway to extremely low-volatility dimers revealed in β-pinene secondary organic aerosol. *Proceedings of the National Academy of Sciences*, 115(33), 8301–8306. <https://doi.org/10.1073/pnas.1804671115>
- Kristensen, K., Cui, T., Zhang, H., Gold, A., Glasius, M., & Surratt, J. D. (2014). Dimers in α-pinene secondary organic aerosol: Effect of hydroxyl radical, ozone, relative humidity and aerosol acidity. *Atmospheric Chemistry and Physics*, 14(8), 4201–4218. <https://doi.org/10.5194/acp-14-4201-2014>
- Kristensen, K., Watne, Å. K., Hammes, J., Lutz, A., Petäjä, T., Hallquist, M., Bilde, M., & Glasius, M. (2016). High-Molecular Weight Dimer Esters Are Major Products in Aerosols from α-Pinene Ozonolysis and the Boreal Forest. *Environmental Science & Technology Letters*, 3(8), 280–285. <https://doi.org/10.1021/acs.estlett.6b00152>
- Poulain, L., Tilgner, A., Brüggemann, M., Mettke, P., He, L., Anders, J., Böge, O., Mutzel, A., & Herrmann, H. (2022). Particle-Phase Uptake and Chemistry of Highly Oxygenated Organic Molecules (HOMs) From α-Pinene OH Oxidation. *Journal of Geophysical Research: Atmospheres*, 127(16), e2021JD036414. <https://doi.org/10.1029/2021JD036414>
